# Supplementary material for: Nodal is a short-range morphogen with activity that spreads through a relay mechanism in human gastruloids
Source: Springer Nature journal article supplement (doi:10.1038/s41467-022-28149-3), 2022-01-25
Supplement: 41467_2022_28149_MOESM3_ESM.pdf [file 41467_2022_28149_MOESM3_ESM.pdf]

## Description of Additional Supplementary Files

File name: Supplementary Movie 1

Description: Activin treated micropatterned Nodal<sup>Cit/Cit</sup> cells with CFP-H2B nuclear marker were imaged for 43h with 30-minute interval. Scale bar, 100  $\mu\text{m}$ . Maximum intensity projection is shown.

File name: Supplementary Movie 2

Description: Wnt3A treated micropatterned Nodal<sup>Cit/Cit</sup> cells with CFP-H2B nuclear marker were imaged for 43h with 30-minute interval. Scale bar, 100  $\mu\text{m}$ . Maximum intensity projection is shown.

File name: Supplementary Movie 3

Description: BMP4 treated micropatterned Nodal<sup>Cit/Cit</sup> cells with CFP-H2B nuclear marker were imaged for 43h with 30-minute interval. Scale bar, 100  $\mu\text{m}$ . Maximum intensity projection is shown.
